# Supplementary material for: Assessing Future Climate Change Impacts on Potato Yields — A Case Study for Prince Edward Island, Canada
Source: MDPI journal article supplement (doi:10.3390/foods12061176), 2023-03-10
Supplement: s1 [file s1]

## Supplementary Information (S1)

### Survey Form on PEI Potato Farming Practices

1. Indicate one potato variety (significant variety on your farm) you want to report about.

*Check all that apply.*

- ☐ Russet Burbank
- ☐ Prospect
- ☐ Dakota Russet
- ☐ Mountain Gem Russet
- ☐ Red Norland (or other table stock red variety)
- ☐ Eva (or other table stock white variety)
- ☐ Satina (or other table stock yellow variety)
- ☐ Creamer
- ☐ Other: \_\_\_\_\_

2. When do you usually start planting the chosen variety?

*Check all that apply.*

- ☐ April 1st – April 15th
- ☐ April 16th – April 30th
- ☐ May 1st – May 15th
- ☐ May 16th – May 31st
- ☐ June 1st – June 15th
- ☐ Other: \_\_\_\_\_

3. What was your farm's previous (last year) crop residue before planting the chosen variety?

*Check all that apply.*

- ☐ There were no previous plant residue
- ☐ Forage crops - incorporated green
- ☐ Forage crops - sprayed with glyphosate.
- ☐ Fall-seeded cover crops (grains, brassica)
- ☐ Corn stover
- ☐ Grain straw
- ☐ Other: \_\_\_\_\_

4. What is your target seed spacing for the chosen variety?

*Check all that apply.*

- ☐ < 8 inches
- ☐ 8 – 10 inches
- ☐ 10 – 12 inches
- ☐ 12 – 14 inches
- ☐ 14 – 16 inches
- ☐ > 16 inches

5. What is the planting depth (in inches) for the chosen variety?

*Check all that apply.*

- ☐ < 5
- ☐ 5 – 6
- ☐ 6 – 7
- ☐ 7 – 8
- ☐ 8 – 9
- ☐ > 9
- ☐ Other: \_\_\_\_\_

6. What irrigation method do you use on your chosen variety?

*Check all that apply.*

- ☐ I do not irrigate on my farm
- ☐ Centre pivot.
- ☐ Reel and gun
- ☐ Travelling boom
- ☐ Drip.
- ☐ Other: \_\_\_\_\_

7. How much water do you usually apply per irrigation application in mm on your chosen variety?

*Check all that apply.*

- ☐ < 5.0 mm
- ☐ 5.1 – 10 mm
- ☐ 10.1 – 15 mm
- ☐ 15.1 – 20 mm

- ☐ 20.1 – 25 mm
- ☐ 25.1 – 30 mm
- ☐ > 30 mm
- ☐ Other: \_\_\_\_\_

8. How many times do you irrigate the chosen variety?

*Check all that apply.*

- ☐ 1 – 3 times
- ☐ 4 – 6 times
- ☐ 7 – 9 times
- ☐ 10 – 12 times
- ☐ > 12 times

9. What N fertilizer do you use on the chosen variety?

*Check all that apply.*

- ☐ Ammonium nitrate
- ☐ Calcium ammonium nitrate
- ☐ Calcium nitrate
- ☐ MESZ/DAP
- ☐ Urea ammonium nitrate
- ☐ ESN
- ☐ Super U/Agrotain
- ☐ Ammonium sulphate
- ☐ Foliar N products (Last N, SRN, e. t. c.)
- ☐ Urea
- ☐ Other: \_\_\_\_\_

10. What method was used to apply the nitrogen fertilizer to the chosen variety?

*Check all that apply.*

- ☐ Pre-plant broadcast
- ☐ Banded at planting
- ☐ Top dress at hilling.
- ☐ In irrigation water (fertigation)
- ☐ Foliar fertilizers
- ☐ Other: \_\_\_\_\_

11. What is the quantity of the nitrogen fertilizer that is applied from all sources to

the chosen variety?

*Check all that apply.*

- ☐ < 100 lbs/ac  
☐ 100 – 150 lbs/ac  
☐ 150 – 200 lbs/ac  
☐ 200 – 250 lbs/ac  
☐ Other: \_\_\_\_\_

12. How often was the nitrogen fertilizer applied to the chosen variety?

*Check all that apply.*

- ☐ 1 – 3 times  
☐ 4 – 6 times  
☐ 7 – 10 times  
☐ Other: \_\_\_\_\_

13. Did you apply manure or compost to the chosen variety?

*Check all that apply.*

- ☐ Compost or manure not applied  
☐ Manure.  
☐ Compost  
☐ Other: \_\_\_\_\_

14. What is the quantity of manure/compost per application, per wet weight on the chosen variety?

*Check all that apply.*

- ☐ < 10 T/ac  
☐ 10 – 20 T/ac  
☐ > 20 T/ac  
☐ Other: \_\_\_\_\_

15. How often do you apply the manure/compost on the chosen variety?

\_\_\_\_\_

16. What is your primary form of tillage ahead of potato planting?

*Check all that apply.*

- ☐ Moldboard plough
- ☐ Discs
- ☐ Chisel plough
- ☐ Vertical (residue, lemkem, pottinger e. t. c.)
- ☐ Other: \_\_\_\_\_

17. How many times do you perform tillage ahead of potato planting?

*Check all that apply.*

- ☐ 1 time
- ☐ 2 times
- ☐ 3 times
- ☐ 4 times
- ☐ Other: \_\_\_\_\_

18. What is the tillage depth per application (inch)?

*Check all that apply.*

- ☐ < 6
- ☐ 6 – 8
- ☐ 8 – 10
- ☐ 10 – 12
- ☐ > 12
- ☐ Other: \_\_\_\_\_

19. What is the typical harvest date for your chosen variety?

*Check all that apply.*

- ☐ Early September
- ☐ Mid September
- ☐ Late September
- ☐ Early October
- ☐ Mid October
- ☐ Late October
- ☐ Other: \_\_\_\_\_

20. How many days does it take for this variety to mature (Planting to harvest)?

*Check all that apply.*

☐ 90 – 100 days

☐ 101 – 120 days

☐ 121 – 130 days

☐ 131 – 140 days

☐ Other: \_\_\_\_\_

21. What is the average yield of the chosen potato variety in cwt/acre at harvest?

\_\_\_\_\_

22. Kindly give the additional necessary information if there is any.

\_\_\_\_\_

\_\_\_\_\_
